# Supplementary material for: Predictive value of post-procedural early (within 24 h) increase in cystatin C for contrast-induced acute kidney injury and mortality following coronary angiography or intervention
Source: PubMed Central journal article supplement (PMC5752559; doi:10.18632/oncotarget.19034), 2017-07-06
Supplement: oncotarget-08-109762-s001.pdf [file oncotarget-08-109762-s001.pdf]

# Predictive value of post-procedural early (within 24 h) increase in cystatin C for contrast-induced acute kidney injury and mortality following coronary angiography or intervention

## SUPPLEMENTARY MATERIALS

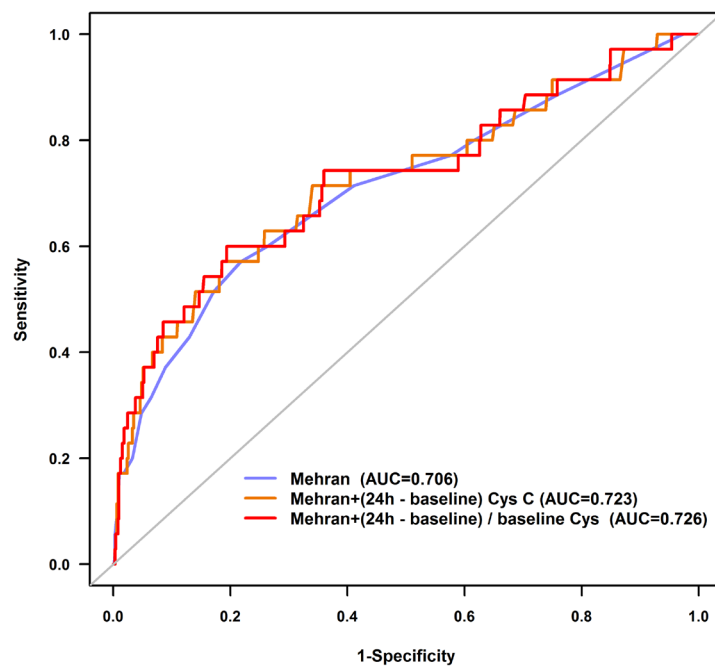

Supplementray Figure 1: Predictive value of Mehran score after adding cystatin C
